1           **Heavy metal pollutants have additive negative effects on honey bee cognition**

2

3   **Running title:** Heavy metal cocktails impair bee cognition

4   **Author list**

5   Coline Monchanin<sup>1,2</sup>, Erwann Drujont<sup>1</sup>, Jean-Marc Devaud<sup>1</sup>, Mathieu Lihoreau<sup>1</sup>, Andrew B.  
6   Barron<sup>2</sup>

7   <sup>1</sup>Research Center on Animal Cognition (CRCA), Center for Integrative Biology (CBI); CNRS,  
8   University Paul Sabatier – Toulouse III, France

9   <sup>2</sup>Department of Biological Sciences, Macquarie University, NSW, Australia

10

11   Corresponding author: [coline.monchanin@univ-tlse3.fr](mailto:coline.monchanin@univ-tlse3.fr)

12

13   **Keywords:** *Apis mellifera*, PER conditioning, pollutant interaction, arsenic, lead, copper

14

15   **Summary statement:**

16   Honey bees displayed reduced learning and memory performances following acute exposure to  
17   arsenic, copper or lead. Exposure to combinations of these metals induced additive effects.

## 18 **Abstract**

19

20 Environmental pollutants can exert sublethal deleterious effects on animals. These include  
21 disruption of cognitive functions underlying crucial behaviours. While agrochemicals have  
22 been identified as a major threat to pollinators, other compounds, such as heavy metals that are  
23 often found in complex mixtures, have largely been overlooked. Here, we assessed the impact  
24 of acute exposure to field-realistic concentrations of lead, copper, arsenic, and their  
25 combinations, on honey bee learning and memory. All treatments involving single metals  
26 slowed down appetitive learning and disrupted memory retrieval at 24 h. Importantly,  
27 combinations of these metals induced additive negative effects on both processes, suggesting  
28 common pathways of toxicity. Our results highlight the need to further assess the risks of heavy  
29 metal pollution on invertebrates and to their associated ecosystem services.

30

## 31 **Introduction**

32

33 Metal pollution is an increasingly important concern for the maintenance of ecosystems and  
34 public health (Nriagu and Pacyna, 1988). Over the last century, the widespread use of heavy  
35 metals in domestic, industrial and agricultural applications (Bradl, 2005) has considerably  
36 elevated their concentrations in water (Mance, 1987) and terrestrial habitats (Krämer, 2010; Su  
37 et al., 2014) to potentially toxic levels.

38 Critical pollinators, such as honey bees, are directly exposed to metal pollutants when  
39 foraging on contaminated nectar and pollen (Perugini et al., 2011; Xun et al., 2018), and while  
40 flying through air containing suspended particles (Thimmegowda et al., 2020). Metals  
41 accumulate in the bodies of adult bees (Giglio et al., 2017) and larvae (Balestra et al., 1992) as  
42 well as in the hive products (Satta et al., 2012). For instance, concomitant bioaccumulation of  
43 arsenic (As), copper (Cu) and lead (Pb), resulting from metal production industries (Kabir et  
44 al., 2012) and mining (Khaska et al., 2018; Lee et al., 2005), is common in honey bees (Badiou-  
45 Bénéteau et al., 2013; Giglio et al., 2017; Goretti et al., 2020) and their honey (Pisani et al.,  
46 2008; Terrab et al., 2005).

47 The deleterious effects of metals on humans are well-known (Tchounwou et al., 2012).  
48 Neural and neuromuscular alterations, sensory impairments and many related forms of  
49 behavioural dysfunctions highlight the neurotoxic effects of As, Cu, Pb and other metals (Chen  
50 et al., 2016). Deficits in cognition and memory have been reported for As (e.g. humans: Tolins  
51 et al., 2014; mice: Tyler et al., 2018; Wu et al., 2006), Pb (e.g. mice: Anderson et al., 2016;

52 humans: Mason et al., 2014) and Cu (e.g. mice: Lamtai et al., 2020; Pal et al., 2013; flies:  
53 Zamberlan, 2020). Recent studies showed that low doses of Pb (Monchanin et al., 2020a) and  
54 selenium (Se) (Burden et al., 2016) also impair behaviour and cognition in honey bees,  
55 suggesting a widespread impact on pollinators. However, very little attention has been given to  
56 the potential combined effects of co-exposure to different metals (Monchanin et al., 2020b).

57 Interactions among stressors are commonly classified as antagonistic (when the effect  
58 of one stressor reduces the effect of the other one), additive (when stressors have cumulative  
59 effects) or synergistic (when stressors together have a greater effect than the sum of their  
60 individual effects) (Folt et al., 1999). Additive effects of As, Cu and Pb have been described  
61 for humans (Lin et al., 2016), rats (Aktar et al., 2017; Mahaffey et al., 1981; Schmolke et al.,  
62 1992) and fishes (Verriopoulos and Dimas, 1988). In rats, for instance, co-exposure to Pb and  
63 As disrupted brain biogenic amine levels (Agrawal et al., 2015). In humans, it was hypothesized  
64 that combined exposure to Pb and As, or other metal pollutants, have additive or synergistic  
65 toxic responses leading to cognitive dysfunction (Karri et al., 2016). To our knowledge, two  
66 studies have addressed the impact of metallic cocktails on bee physiology. Bees simultaneously  
67 exposed to Pb, cadmium (Cd) and Cu accumulated significant levels of those metals and had  
68 lower brain concentrations of dopamine compared to unexposed bees (Nisbet et al., 2018). Cd  
69 and Cu exerted a weak synergistic effect on bee survival (Di et al., 2020). However, none of  
70 these studies investigated potential effects of combined exposure on cognition.

71 Here we explored the effects of an exposure to single or combinations of metals on bee  
72 learning and memory. We hypothesised that combinations of metals may have synergistic  
73 negative effects, as it has been found with pesticides (Yao et al., 2018; Zhu et al., 2017). We  
74 tested individual honey bees in a standard protocol of proboscis extension reflex (PER)  
75 conditioning following acute exposure to As, Pb and Cu or a combination of them. We tested  
76 three concentrations of As, considered the most toxic substance (ATSDR, 2019), and added  
77 one concentration of Cu or Pb (binary mixtures), or both (tertiary mixture), to reach the molarity  
78 of the As solutions, allowing us to better assess any combined effects.

79

## 80 **Materials and methods**

81

### 82 *Metal solutions*

83 Arsenic (NaAsO<sub>2</sub>), lead (PbCl<sub>2</sub>) and copper (CuCl<sub>2</sub>·2H<sub>2</sub>O) were purchased from Sigma-Aldrich  
84 Ltd (Lyon, France) and diluted in 50% (w/v) sucrose solution. Control bees were fed 50%  
85 sucrose solution. We used three concentrations of As (Table 1): a low concentration (0.13 μM)

86 corresponding to the maximal permissible value in water (0.01 mg.L<sup>-1</sup>) (Codex Alimentarius,  
 87 2015), a high concentration (0.67 μM) corresponding to half the maximal permissible value in  
 88 irrigation water (0.1 mg.L<sup>-1</sup>) (Ayers and Westcot, 1994), and an intermediate concentration  
 89 (0.40 μM). This range of concentrations was reported in water sampled from polluted areas  
 90 (e.g. mining sites) and in honey (Table S1). For Pb and Cu, we chose 0.27 μM (0.055 mg.L<sup>-1</sup> of  
 91 Pb and 0.017 mg.L<sup>-1</sup> of Cu) so that the binary combinations (As 0.13 μM + Cu 0.27 μM or As  
 92 0.13 μM + Pb 0.27 μM) could be compared to the As intermediate concentration (0.40 μM),  
 93 and the tertiary combination (As 0.13 μM + Pb 0.27 μM + Cu 0.27 μM) to the As high  
 94 concentration (0.67 μM) (Table 1). These concentrations of Pb and Cu have also been reported  
 95 in honey samples (Table S1). All concentrations fell within sublethal ranges for the honey bee:  
 96 the LD50 of elemental As for NaAsO<sub>2</sub> ranged from 0.330 to 0.540 ug/bee (Fujii, 1980), the  
 97 LD50 of Cu is 72 mg.L<sup>-1</sup> (Di et al., 2016) and of Pb is 345 mg.L<sup>-1</sup> (Di et al., 2016).

98

99 **Table 1: Concentrations used.** Combined treatments are shown in grey.

| Treatment  | Molarity (μM) | Concentration (mg.L <sup>-1</sup> ) |      |      | Ingestion of 5μL (ng/bee) |      |      |
|------------|---------------|-------------------------------------|------|------|---------------------------|------|------|
|            |               | As                                  | Cu   | Pb   | As                        | Cu   | Pb   |
| Control    | 0             | 0                                   | 0    | 0    | 0                         | 0    | 0    |
| Low [As]   | 0.13          | 0.01                                | 0    | 0    | 0.05                      | 0    | 0    |
| [Cu]       | 0.27          | 0                                   | 0.02 | 0    | 0                         | 0.09 | 0    |
| [Pb]       | 0.27          | 0                                   | 0    | 0.06 | 0                         | 0    | 0.28 |
| Med [As]   | 0.40          | 0.03                                | 0    | 0    | 0.15                      | 0    | 0    |
| [As+Cu]    | 0.40          | 0.01                                | 0.02 | 0    | 0.05                      | 0.09 | 0    |
| [As+Pb]    | 0.40          | 0.01                                | 0    | 0.06 | 0.05                      | 0    | 0.28 |
| High [As]  | 0.67          | 0.05                                | 0    | 0    | 0.25                      | 0    | 0    |
| [As+Cu+Pb] | 0.67          | 0.01                                | 0.02 | 0.06 | 0.05                      | 0.09 | 0.28 |

100

101 *Bee exposure to metals*

102 We collected honey bees (*Apis mellifera*) returning from foraging trips at the hive entrance in  
 103 mornings of August 2020. We then anesthetised the bees on ice and harnessed them in plastic  
 104 tubes, secured with tape and a droplet of wax at the back of the head (Matsumoto et al., 2012).  
 105 We fed them 5 μL of 50% sucrose solution (see Table 1) and left them to rest for 3 h in the  
 106 incubator (temperature: 25±2°C, humidity: 60%).

107

108 *Absolute learning*

109 Prior to conditioning, we tested all bees for PER by stimulating their antennae with 50% sucrose  
110 solution, and kept only those that displayed the reflex. We then performed olfactory absolute  
111 conditioning according to a standard protocol using an automatic stimulus delivery system  
112 (Aguiar et al., 2018). Bees had to learn to respond to an olfactory conditioned stimulus (CS, 1-  
113 nonanol, Sigma-Aldrich Ltd, Lyon, France) reinforced with 50% sucrose solution, over five  
114 conditioning trials with a ten-minute inter-trial interval. Each trial (37 s in total) began when a  
115 bee was placed in front of the stimulus delivery system, which released a continuous flow of  
116 clean air (3,300 mL.min<sup>-1</sup>) to the antennae. After 15 s, the odour was introduced into the airflow  
117 for 4 s, the last second of which overlapped with sucrose presentation to the antennae using a  
118 toothpick with subsequent feeding for 4 seconds by presenting the toothpick to the proboscis.  
119 The bee remained another 15 s under the clean airflow. We recorded the presence or absence  
120 (1/0) of a conditioned PER in response to the odorant presentation during each conditioning  
121 trial. Bees spontaneously responding in the first conditioning trial were discarded from the  
122 analysis. The sum of conditioned responses over all trials provided an individual acquisition  
123 score (between 0 and 4), and bees responding at the last trial were categorized as learners.

124

125 *Long-term memory*

126 After conditioning, bees were fed 15 µL of 50% sucrose solution, left overnight in the incubator,  
127 and fed another 5 µL of sucrose solution the following morning. Three hours after (24 h post-  
128 conditioning), we performed the retention test, consisting of three trials similar to conditioning  
129 except that no sucrose reward was presented. In addition to the odour used during the  
130 conditioning (CS), we presented two novel odours, in randomized order, to assess the  
131 specificity of the memory: nonanal was expected to be perceived by bees similarly to 1-nonanol,  
132 while 1-hexanol was expected to be perceived differently (Guerrieri et al., 2005). We recorded  
133 the presence or absence (1/0) of a conditioned PER to each odorant at each memory retention  
134 trial. We classified bees according to their response patterns: response to the CS only, response  
135 to the CS and the similar odour (low generalization level), response to all odours (high  
136 generalization level), no or inconsistent response.

137

138 *Statistics*

139 We analysed the data using R Studio v.1.2.5033 (RStudio Team, 2015). Raw data are available  
140 in Dataset S1. We performed binomial generalised linear mixed-effects models (GLMM)  
141 (package lme4; Bates et al., 2015), with hive and conditioning date as random factors and

142 treatment as fixed effect. Using the GLMMs, we evaluated whether treatment impacted the  
143 initial response to antennal stimulation, the spontaneous response in the first conditioning trial,  
144 the level of response in the last trial, the level of response to each odorant during the memory  
145 test, the proportion of bees per response pattern in the retention test, and the survival at 24 h.  
146 Note that only bees that had learnt the task were kept for the analysis of memory performance.  
147 Acquisition scores were standardised and compared with GLMMs using Template Model  
148 Builder (Brooks et al., 2017). For all response variables, we compared (1) the treated groups to  
149 the control, (2) groups exposed to concentrations of the same molarity (e.g. Med [As], [As+Cu]  
150 and [As+Pb]), (3) the separate and joint effects of the treatments (e.g. Low [As], [Cu] and  
151 [As+Cu]) in order to better identify interactive effects (antagonism, additive, synergism).

152

## 153 **Results and discussion**

154

### 155 *Exposure to metals did not impact appetitive motivation*

156 The proportion of bees that responded to the initial antennal stimulation with sucrose was  
157 similar among treatments (GLMM:  $p > 0.05$ ), with only 2.27% (1 out of 42 bees) of Low [As]  
158 and 4.08% (2 out of 46 bees) of [As+Cu+Pb] bees that did not respond. All bees responded in  
159 the other groups. Therefore, treatment did not affect appetitive motivation or sucrose  
160 perception, as previously reported with similar concentrations of Pb and Cu (Burden et al.,  
161 2019).

162

### 163 *Individual and joint exposures to metals reduced learning performances*

164 Two out of the 381 bees submitted to the absolute learning task spontaneously responded to the  
165 first odour presentation and were therefore discarded. In all groups, the number of bees showing  
166 the conditioned response increased over trials, thus showing learning (Fig. 1A). However, fewer  
167 bees exposed to metals learned the task when compared to controls (GLMM:  $p < 0.05$ ), except  
168 for Low [As] (GLMM:  $-1.920 \pm 1.103$ ,  $p = 0.082$ ). Accordingly, the acquisition scores of bees  
169 were significantly affected by treatment (Fig. 1B). Bees exposed to Med [As] (GLMM:  $-$   
170  $0.610 \pm 0.246$ ,  $p = 0.013$ ), High [As] (GLMM:  $-0.639 \pm 0.241$ ,  $p = 0.008$ ) and [As+Cu+Pb]  
171 (GLMM:  $-0.592 \pm 0.244$ ,  $p = 0.015$ ) had similar acquisition scores, all significantly lower than  
172 control bees. Bees exposed to [As+Pb] and Med [As] had similar acquisition scores, but bees  
173 exposed to [As+Cu] performed better (GLMM:  $0.596 \pm 0.241$ ,  $p = 0.013$ ). Bees exposed to High  
174 [As] and [As+Cu+Pb] exhibited similar acquisition scores (GLMM:  $p = 0.810$ ). We found no  
175 difference in the acquisition scores and the proportions of learners between individual and

176 mixed treatments (GLMM:  $p>0.05$ ), indicating an additive effect. Thus, exposure to metals  
177 significantly reduced learning performance, and combined exposure exerted additive  
178 deleterious effects.

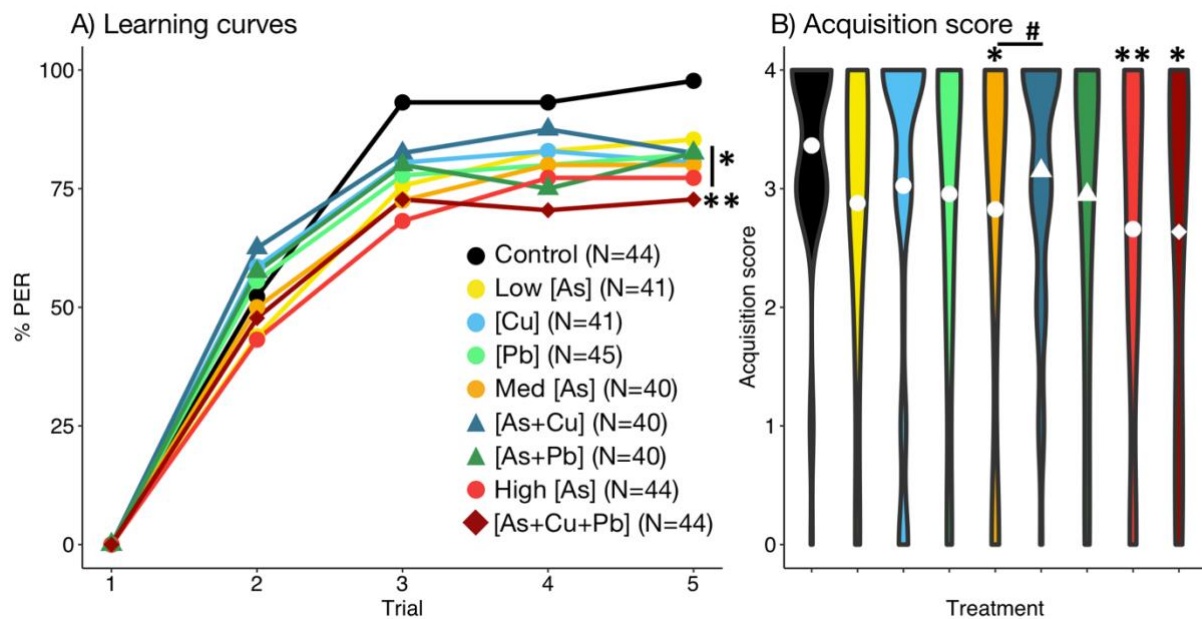

179  
180 **Figure 1: Learning. A)** Learning curves show changes in the percentages of bees displaying  
181 the conditioned proboscis extension response (PER) over five training trials. Asterisks indicate  
182 significant differences in responses at the last trial compared to control bees. **B)** Violin plots of  
183 acquisition score values (sums of conditioned responses for each bee). Symbols (*circle*: single  
184 exposure; *triangle*: binary mixture; *diamond*: tertiary mixture) indicate the mean score for each  
185 treatment. Significant differences between groups exposed to the same molarity solutions (#)  
186 or with respect to control bees (\*) are indicated (#/\* $p<0.05$ , \*\* $p<0.01$ ; GLMM).

187

### 188 *Individual and joint exposures to metals reduced long-term memory specificity*

189 We found no effect of treatment on survival at 24 h (GLMM:  $p>0.05$ ). However, long-term  
190 memory was significantly affected (Fig. 2). Bees from all treatments, except Med [As] and  
191 High [As], responded less to the learnt odour (CS) than control bees (GLMM:  $p<0.05$ ) (Fig.  
192 2A). Bees from all treatments responded similarly to the similar odour (GLMM:  $p>0.05$ ). For  
193 the different odour, only bees from High [As] responded more than controls (GLMM:  
194  $1.242\pm 0.625$ ,  $p=0.047$ ), indicating a higher degree of response generalization. We found no  
195 difference in the responses to the three different odours when comparing the groups exposed to  
196 metal solutions with the same molarity, nor between individual and mixed treatments (GLMM:  
197  $p>0.05$ ), thus indicating an additive effect.



198 Individual response patterns (Fig. 2B) revealed a loss of memory specificity in bees  
 199 exposed to [Pb] (GLMM:  $-1.795 \pm 0.690$ ,  $p=0.009$ ), Low [As] (GLMM:  $-1.313 \pm 0.589$ ,  $p=0.026$ )  
 200 and [As+Cu+Pb] (GLMM:  $-1.200 \pm 0.588$ ,  $p=0.041$ ). The distributions of individual response  
 201 patterns also revealed additive effects as they did not differ among groups exposed to solutions  
 202 with the same molarity, nor between single and mixed metal treatments (GLMM:  $p>0.05$ ).  
 203 Importantly, bees from all treatment groups but one (Med [As]) failed to respond consistently  
 204 more often than controls (GLMM:  $p<0.05$ ). Thus, most treatments reduced memory  
 205 performance at 24h.  
 206

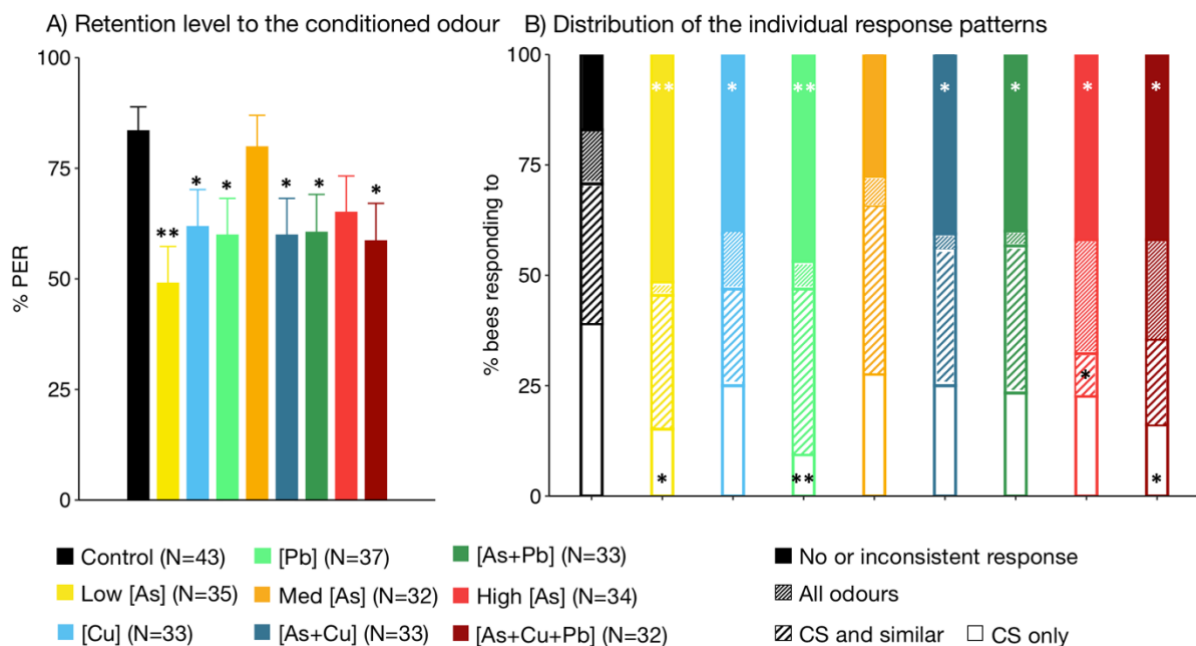

207  
 208 **Figure 2: Long-term memory.** A) Percentages of responses to the CS odour in the 24 h-  
 209 memory retention test (mean  $\pm$  s.e.m). B) Distribution of bees according to their individual  
 210 response pattern during the long-term memory test: response to CS only; response to CS and  
 211 similar; response to all odours; no or inconsistent response. Significant differences with controls  
 212 are indicated (\* $p<0.05$ , \*\* $p<0.01$ ; GLMM).  
 213

214 *The additive effects of metal mixtures may be explained by common pathways of toxicity*

215 Although many mechanisms of metal toxicity have not yet been elucidated, some general  
 216 common points already emerge from the literature. By mimicking other ions (Bridges and  
 217 Zalups, 2005), metals can disrupt signalling and calcium homeostasis (particularly important in  
 218 neurons) by interfering with the calcium channels (Bridges and Zalups, 2005; Chavez-Crooker  
 219 et al., 2001; Tamano and Takeda, 2011). This might lead to dysfunction and cytotoxicity due



220 to the disruption of cell signalling and calcium homeostasis. Genotoxicity (Doğanlar et al.,  
221 2014) may be achieved through covalent binding to DNA (Brocato and Costa, 2013; Senut et  
222 al., 2014). Eventually, oxidative stress and lipid peroxidation of the cell membrane may lead to  
223 neuronal death. Based on their shared mechanisms of toxicity, such as oxidative stress (Nikolić  
224 et al., 2016; Zaman et al., 1995), apoptosis (Raes et al., 2000) and interference with  
225 neurotransmitters (Nisbet et al., 2018), the toxic effects of heavy metals mixtures may be  
226 expected to be additive.

227

## 228 **Conclusion**

229 We demonstrate that arsenic, lead, copper or combinations of these metals, at levels found in  
230 the environment, slow down appetitive learning and reduce long-term memory specificity.  
231 Importantly, these metals show additive effects as we found no differences between different  
232 solutions of the same molarity, suggesting that concentration was more important than identity  
233 of any specific metal for the toxicity. Learning and memory of olfactory cues play crucial roles  
234 in the behavioural ecology of bees, for the identification of profitable resources, social  
235 interactions and the recruitment of nestmates (Farina et al., 2005; Grüter et al., 2006).  
236 Therefore, ultimately, acute exposure to metal pollutants mixtures could impair fundamental  
237 hive function and population growth, a snowball effect that may be even more critical in many  
238 solitary bees that cannot rely on new cohorts of workers to replace contaminated individuals  
239 and engage in food provisioning (Klein et al., 2017).

240

## 241 **Acknowledgments**

242 We thank Olivier Fernandez for assistance with beekeeping.

243

## 244 **Competing interests**

245 The authors declare no competing or financial interests.

246

## 247 **Funding**

248 This work was supported by the CNRS. CM was funded by a PhD fellowship from French  
249 Ministry of Higher Education, Research and Innovation. ABB was funded by a Future  
250 Fellowship from the Australian Research Council (FT140100452) and the Eldon and Anne  
251 Foote Trust. ML was funded by grants of the Agence Nationale de la Recherche (ANR-16-  
252 CE02-0002-01, ANR-19-CE37-0024) and the European Regional Development Fund (project  
253 ECONECT).

254 **Data availability**

255 Raw data will be available on Dryad repository upon publication.

256

257 **References**

258 **Agrawal, S., Bhatnagar, P. and Flora, S. J. S.** (2015). Changes in tissue oxidative stress,  
259 brain biogenic amines and acetylcholinesterase following co-exposure to lead, arsenic  
260 and mercury in rats. *Food and Chemical Toxicology* **86**, 208–216.

261 **Aguiar, J. M. R. B. V., Roselino, A. C., Sazima, M. and Giurfa, M.** (2018). Can honey bees  
262 discriminate between floral-fragrance isomers? *J Exp Biol* **221**, jeb180844.

263 **Aktar, S., Jahan, M., Alam, S., Mohanto, N. C., Arefin, A., Rahman, A., Haque, A.,**  
264 **Himeno, S., Hossain, K. and Saud, Z. A.** (2017). Individual and combined effects of  
265 arsenic and lead on behavioral and biochemical changes in mice. *Biol Trace Elem Res*  
266 **177**, 288–296.

267 **Anderson, D. W., Mettil, W. and Schneider, J. S.** (2016). Effects of low level lead exposure  
268 on associative learning and memory in the rat: Influences of sex and developmental  
269 timing of exposure. *Toxicology Letters* **246**, 57–64.

270 **ATSDR** (2019). The ATSDR 2019 Substance Priority List.

271 **Ayers, R. S. and Westcot, D. W.** (1994). *Water quality for agriculture*. Food and Agriculture  
272 Organization of the United Nations, Rome.

273 **Badiou-Bénéteau, A., Benneveau, A., Géret, F., Delatte, H., Becker, N., Brunet, J. L.,**  
274 **Reynaud, B. and Belzunces, L. P.** (2013). Honeybee biomarkers as promising tools to  
275 monitor environmental quality. *Environment International* **60**, 31–41.

276 **Balestra, V., Celli, G. and Porrini, C.** (1992). Bees, honey, larvae and pollen in biomonitoring  
277 of atmospheric pollution. *Aerobiologia* **8**, 122–126.

278 **Bates, D., Mächler, M., Bolker, B. and Walker, S.** (2015). Fitting linear mixed-effects models  
279 using lme4. *J. Stat. Soft.* **67**, 1–48.

280 **Bradl, H. B.** (2005). Sources and origins of heavy metals. In *Interface Science and Technology*  
281 (ed. Bradl, H. B.), pp. 1–27. Elsevier.

282 **Bridges, C. C. and Zalups, R. K.** (2005). Molecular and ionic mimicry and the transport of  
283 toxic metals. *Toxicology and Applied Pharmacology* **204**, 274–308.

284 **Brocato, J. and Costa, M.** (2013). Basic mechanics of DNA methylation and the unique  
285 landscape of the DNA methylome in metal-induced carcinogenesis. *Critical Reviews in*  
286 *Toxicology* **43**, 493–514.

287 **Brooks, M., E., Kristensen, K., van Benthem, K. J., Magnusson, A., Berg, C., W., Nielsen,**  
288 **A., Skaug, H., J., Maechler, M. and Bolker, B., M.** (2017). glmmTMB balances speed

- 289 and flexibility among packages for zero-inflated generalized linear mixed modeling.  
290 *The R Journal* **9**, 378–400.
- 291 **Burden, C. M., Elmore, C., Hladun, K. R., Trumble, J. T. and Smith, B. H.** (2016). Acute  
292 exposure to selenium disrupts associative conditioning and long-term memory recall in  
293 honey bees (*Apis mellifera*). *Ecotoxicol. Environ. Saf.* **127**, 71–79.
- 294 **Burden, C. M., Morgan, M. O., Hladun, K. R., Amdam, G. V., Trumble, J. J. and Smith,  
295 B. H.** (2019). Acute sublethal exposure to toxic heavy metals alters honey bee (*Apis  
296 mellifera*) feeding behavior. *Sci Rep* **9**, 4253.
- 297 **Chavez-Crooker, P., Garrido, N. and Ahearn, G. A.** (2001). Copper transport by lobster  
298 hepatopancreatic epithelial cells separated by centrifugal elutriation: measurements  
299 with the fluorescent dye Phen Green. *J. Exp. Biol.* **204**, 1433.
- 300 **Chen, P., Miah, M. R. and Aschner, M.** (2016). Metals and neurodegeneration. *F1000Res* **5**,  
301 366.
- 302 **Codex Alimentarius** (2015). *Codex general standard for contaminants and toxins in food and  
303 feed - CODEX STAN 193-1995*. Joint FAO/WHO.
- 304 **Di, N., Hladun, K. R., Zhang, K., Liu, T.-X. and Trumble, J. T.** (2016). Laboratory  
305 bioassays on the impact of cadmium, copper and lead on the development and survival  
306 of honeybee (*Apis mellifera* L.) larvae and foragers. *Chemosphere* **152**, 530–538.
- 307 **Di, N., Zhang, K., Hladun, K. R., Rust, M., Chen, Y.-F., Zhu, Z.-Y., Liu, T.-X. and  
308 Trumble, J. T.** (2020). Joint effects of cadmium and copper on *Apis mellifera* foragers  
309 and larvae. *Comparative Biochemistry and Physiology Part C: Toxicology &  
310 Pharmacology* **237**, 108839.
- 311 **Doğanlar, Z. B., Doğanlar, O. and Tabakçioğlu, K.** (2014). Genotoxic effects of heavy metal  
312 mixture in *Drosophila melanogaster*: Expressions of heat shock proteins, RAPD  
313 profiles and mitochondrial DNA sequence. *Water Air Soil Pollut* **225**, 2104.
- 314 **Farina, W. M., Grüter, C. and Díaz, P. C.** (2005). Social learning of floral odours inside the  
315 honeybee hive. *Proc. R. Soc. B.* **272**, 1923–1928.
- 316 **Folt, C. L., Chen, C. Y., Moore, M. V. and Burnaford, J.** (1999). Synergism and antagonism  
317 among multiple stressors. *Limnol. Oceanogr.* **44**, 864–877.
- 318 **Fujii, L. K.** (1980). Oral dose toxicity vs. tissue residue levels of arsenic in the honey bee (*Apis  
319 mellifera* L.). *PhD thesis*, University of Montana, Missoula, MT.
- 320 **Giglio, A., Ammendola, A., Battistella, S., Naccarato, A., Pallavicini, A., Simeon, E.,  
321 Tagarelli, A. and Giulianini, P. G.** (2017). *Apis mellifera ligustica*, Spinola 1806 as  
322 bioindicator for detecting environmental contamination: a preliminary study of heavy  
323 metal pollution in Trieste, Italy. *Environ Sci Pollut Res* **24**, 659–665.
- 324 **Goretti, E., Pallottini, M., Rossi, R., La Porta, G., Gardi, T., Cenci Goga, B. T., Elia, A.  
325 C., Galletti, M., Moroni, B., Petroselli, C., et al.** (2020). Heavy metal bioaccumulation  
326 in honey bee matrix, an indicator to assess the contamination level in terrestrial  
327 environments. *Environ Pollut* **256**, 113388.

- 328 **Grüter, C., Acosta, L. E. and Farina, W. M.** (2006). Propagation of olfactory information  
329 within the honeybee hive. *Behav Ecol Sociobiol* **60**, 707–715.
- 330 **Guerrieri, F., Schubert, M., Sandoz, J.-C. and Giurfa, M.** (2005). Perceptual and neural  
331 olfactory similarity in honeybees. *PLoS Biol* **3**, e60.
- 332 **Kabir, E., Ray, S., Kim, K.-H., Yoon, H.-O., Jeon, E.-C., Kim, Y. S., Cho, Y.-S., Yun, S.-**  
333 **T. and Brown, R. J. C.** (2012). Current status of trace metal pollution in soils affected  
334 by industrial activities. *The Scientific World Journal* **2012**, 1–18.
- 335 **Karri, V., Schuhmacher, M. and Kumar, V.** (2016). Heavy metals (Pb, Cd, As and MeHg)  
336 as risk factors for cognitive dysfunction: A general review of metal mixture mechanism  
337 in brain. *Environmental Toxicology and Pharmacology* **48**, 203–213.
- 338 **Khaska, M., Le Gal La Salle, C., Sassine, L., Cary, L., Bruguier, O. and Verdoux, P.**  
339 (2018). Arsenic and metallic trace elements cycling in the surface water-groundwater-  
340 soil continuum down-gradient from a reclaimed mine area: Isotopic imprints. *Journal*  
341 *of Hydrology* **558**, 341–355.
- 342 **Klein, S., Cabriol, A., Devaud, J.-M., Barron, A. B. and Lihoreau, M.** (2017). Why bees  
343 are so vulnerable to environmental stressors. *Trends Ecol. Evol.* **32**, 268–278.
- 344 **Krämer, U.** (2010). Metal hyperaccumulation in plants. *Annu. Rev. Plant Biol.* **61**, 517–534.
- 345 **Lamtai, M., Zghari, O., Ouakki, S., Marmouzi, I., Mesfioui, A., El Hessni, A. and**  
346 **Ouichou, A.** (2020). Chronic copper exposure leads to hippocampus oxidative stress  
347 and impaired learning and memory in male and female rats. *Toxicol Res.* **36**, 359–366.
- 348 **Lee, J.-S., Chon, H.-T. and Kim, K.-W.** (2005). Human risk assessment of As, Cd, Cu and  
349 Zn in the abandoned metal mine site. *Environ Geochem Health* **27**, 185–191.
- 350 **Lin, X., Gu, Y., Zhou, Q., Mao, G., Zou, B. and Zhao, J.** (2016). Combined toxicity of heavy  
351 metal mixtures in liver cells: Combined toxicity of heavy metal mixtures in liver cells.  
352 *J. Appl. Toxicol.* **36**, 1163–1172.
- 353 **Mahaffey, K. R., Capar, S. G., Gladen, B. C. and Fowler, B. A.** (1981). Concurrent exposure  
354 to lead, cadmium, and arsenic: effects on toxicity and tissue metal concentrations in the  
355 rat. *The Journal of Laboratory and Clinical Medicine* **98**, 463–481.
- 356 **Mance, G.** (1987). *Pollution threat of heavy metals in aquatic environments*. The Netherlands:  
357 Springer Science & Business Media.
- 358 **Mason, L. H., Harp, J. P. and Han, D. Y.** (2014). Pb neurotoxicity: neuropsychological  
359 effects of lead toxicity. *Biomed Res Int* **2014**, 1–8.
- 360 **Matsumoto, Y., Menzel, R., Sandoz, J.-C. and Giurfa, M.** (2012). Revisiting olfactory  
361 classical conditioning of the proboscis extension response in honey bees: A step toward  
362 standardized procedures. *J Neurosci Methods* **211**, 159–167.
- 363 **Monchanin, C., Blanc-Brude, A., Drujont, E., Negahi, M. M., Pasquaretta, C., Silvestre,**  
364 **J., Baqué, D., Elger, A., Barron, A. B., Devaud, J.-M., et al.** (2020a). Chronic  
365 exposure to lead impairs honey bee learning. *Authorea*.

- 366 **Monchanin, C., Devaud, J.-M., Barron, A. and Lihoreau, M.** (2020b). Current permissible  
367 levels of heavy metal pollutants harm terrestrial invertebrates. *Authorea*.
- 368 **Nikolić, T. V., Kojić, D., Orčić, S., Batinić, D., Vukašinić, E., Blagojević, D. P. and**  
369 **Purać, J.** (2016). The impact of sublethal concentrations of Cu, Pb and Cd on honey  
370 bee redox status, superoxide dismutase and catalase in laboratory conditions.  
371 *Chemosphere* **164**, 98–105.
- 372 **Nisbet, C., Guler, A., Ormanci, N. and Cenesiz, S.** (2018). Preventive action of zinc against  
373 heavy metals toxicity in honeybee. *Afr. J. Biochem. Res.* **12**, 1–6.
- 374 **Nriagu, J. O. and Pacyna, J. M.** (1988). Quantitative assessment of worldwide contamination  
375 of air, water and soils by trace metals. *Nature* **333**, 134–139.
- 376 **Pal, A., Badyal, R. K., Vasishta, R. K., Attri, S. V., Thapa, B. R. and Prasad, R.** (2013).  
377 Biochemical, histological, and memory impairment effects of chronic copper toxicity:  
378 a model for non-wilsonian brain copper toxicosis in wistar rat. *Biol Trace Elem Res* **153**,  
379 257–268.
- 380 **Perugini, M., Manera, M., Grotta, L., Abete, M. C., Tarasco, R. and Amorena, M.** (2011).  
381 Heavy metal (Hg, Cr, Cd, and Pb) contamination in urban areas and wildlife reserves:  
382 honeybees as bioindicators. *Biol Trace Elem Res* **140**, 170–176.
- 383 **Pisani, A., Protano, G. and Riccobono, F.** (2008). Minor and trace elements in different honey  
384 types produced in Siena County (Italy). *Food Chemistry* **107**, 1553–1560.
- 385 **Raes, H., Braeckman, B. P., Criel, G. R. J., Rzeznik, U. and Vanfleteren, J. R.** (2000).  
386 Copper induces apoptosis in *Aedes C6/36* cells. *Journal of Experimental Zoology* **286**,  
387 1–12.
- 388 **RStudio Team** (2015). RStudio: integrated development for R. RStudio, Inc., Boston, MA  
389 URL <http://www.rstudio.com/>.
- 390 **Satta, A., Verdinelli, M., Ruiu, L., Buffa, F., Salis, S., Sassu, A. and Floris, I.** (2012).  
391 Combination of beehive matrices analysis and ant biodiversity to study heavy metal  
392 pollution impact in a post-mining area (Sardinia, Italy). *Environ Sci Pollut Res* **19**,  
393 3977–3988.
- 394 **Schmolke, G., Elsenhans, B., Ehtechami, C. and Forth, W.** (1992). Arsenic-copper  
395 interaction in the kidney of the rat. *Hum Exp Toxicol* **11**, 315–321.
- 396 **Senut, M.-C., Sen, A., Cingolani, P., Shaik, A., Land, S. J. and Ruden, D. M.** (2014). Lead  
397 exposure disrupts global DNA methylation in human embryonic stem cells and alters  
398 their neuronal differentiation. *Toxicological Sciences* **139**, 142–161.
- 399 **Su, C., Jiang, L. and Zhang, W.** (2014). A review on heavy metal contamination in the soil  
400 worldwide: Situation, impact and remediation techniques. *Environmental Skeptics and*  
401 *Critics* **3**, 24–38.
- 402 **Tamano, H. and Takeda, A.** (2011). Dynamic action of neurometals at the synapse.  
403 *Metallomics* **3**, 656.



- 404 **Tchounwou, P. B., Yedjou, C. G., Patlolla, A. K. and Sutton, D. J.** (2012). Heavy metal  
405 toxicity and the environment. In *Molecular, Clinical and Environmental Toxicology*  
406 (ed. Luch, A.), pp. 133–164. Basel: Springer Basel.
- 407 **Terrab, A., Recamales, A., Gonzalezmiret, M. and Heredia, F.** (2005). Contribution to the  
408 study of avocado honeys by their mineral contents using inductively coupled plasma  
409 optical emission spectrometry. *Food Chemistry* **92**, 305–309.
- 410 **Thimmegowda, G. G., Mullen, S., Sottolare, K., Sharma, A., Mohanta, S. S., Brockmann,**  
411 **A., Dhandapany, P. S. and Olsson, S. B.** (2020). A field-based quantitative analysis  
412 of sublethal effects of air pollution on pollinators. *Proc Natl Acad Sci USA* **117**, 20653–  
413 20661.
- 414 **Tolins, M., Ruchirawat, M. and Landrigan, P.** (2014). The developmental neurotoxicity of  
415 arsenic: cognitive and behavioral consequences of early life exposure. *Annals of Global*  
416 *Health* **80**, 303–314.
- 417 **Tyler, C. R. S., Smoake, J. J. W., Solomon, E. R., Villicana, E., Caldwell, K. K. and Allan,**  
418 **A. M.** (2018). Sex-dependent effects of the histone deacetylase inhibitor, sodium  
419 valproate, on reversal learning after developmental arsenic exposure. *Front. Genet.* **9**,  
420 1–14.
- 421 **Verriopoulos, G. and Dimas, S.** (1988). Combined toxicity of copper, cadmium, zinc, lead,  
422 nickel, and chrome to the copepod *Tisbe holothuriae*. *Bull. Environ. Contam. Toxicol.*  
423 **41**, 378–384.
- 424 **Wu, C., Gu, X., Ge, Y., Zhang, J. and Wang, J.** (2006). Effects of high fluoride and arsenic  
425 on brain biochemical indexes and learning-memory in rats. *Fluoride* **39**, 274–279.
- 426 **Xun, E., Zhang, Y., Zhao, J. and Guo, J.** (2018). Heavy metals in nectar modify behaviors of  
427 pollinators and nectar robbers: consequences for plant fitness. *Environmental Pollution*  
428 **242**, 1166–1175.
- 429 **Yao, J., Zhu, Y. C., Adamczyk, J. and Luttrell, R.** (2018). Influences of acephate and  
430 mixtures with other commonly used pesticides on honey bee (*Apis mellifera*) survival  
431 and detoxification enzyme activities. *Comparative Biochemistry and Physiology Part*  
432 *C: Toxicology & Pharmacology* **209**, 9–17.
- 433 **Zaman, K., MacGill, R. S., Johnson, J. E., Ahmad, S. and Pardini, R. S.** (1995). An insect  
434 model for assessing oxidative stress related to arsenic toxicity: arsenic toxicity and  
435 oxidative stress. *Arch. Insect Biochem. Physiol.* **29**, 199–209.
- 436 **Zamberlan, D. C.** (2020). Copper decreases associative learning and memory in *Drosophila*  
437 *melanogaster*. *Science of the Total Environment* **9**, 1–14.
- 438 **Zhu, Y. C., Yao, J., Adamczyk, J. and Luttrell, R.** (2017). Synergistic toxicity and  
439 physiological impact of imidacloprid alone and binary mixtures with seven  
440 representative pesticides on honey bee (*Apis mellifera*). *PLoS ONE* **12**, e0176837.

441
